# Supplementary material for: Effect of the Nanorough Surface of TiO2 Thin Films on the Compatibility with Endothelial Cells
Source: MDPI journal article supplement (doi:10.3390/ijms24076699), 2023-04-03
Supplement: s1 [file s1]

## Effect of the Nanorough Surface of TiO<sub>2</sub> Thin Films on the Compatibility with Endothelial Cells

Irina Yu. Zhuravleva, Maria A. Surovtseva, Andrey A. Vaver, Evgeny A. Suprun, Irina I. Kim, Natalia A. Bondarenko, Oleg S. Kuzmin, Alexander P. Mayorov and Olga V. Poveshchenko

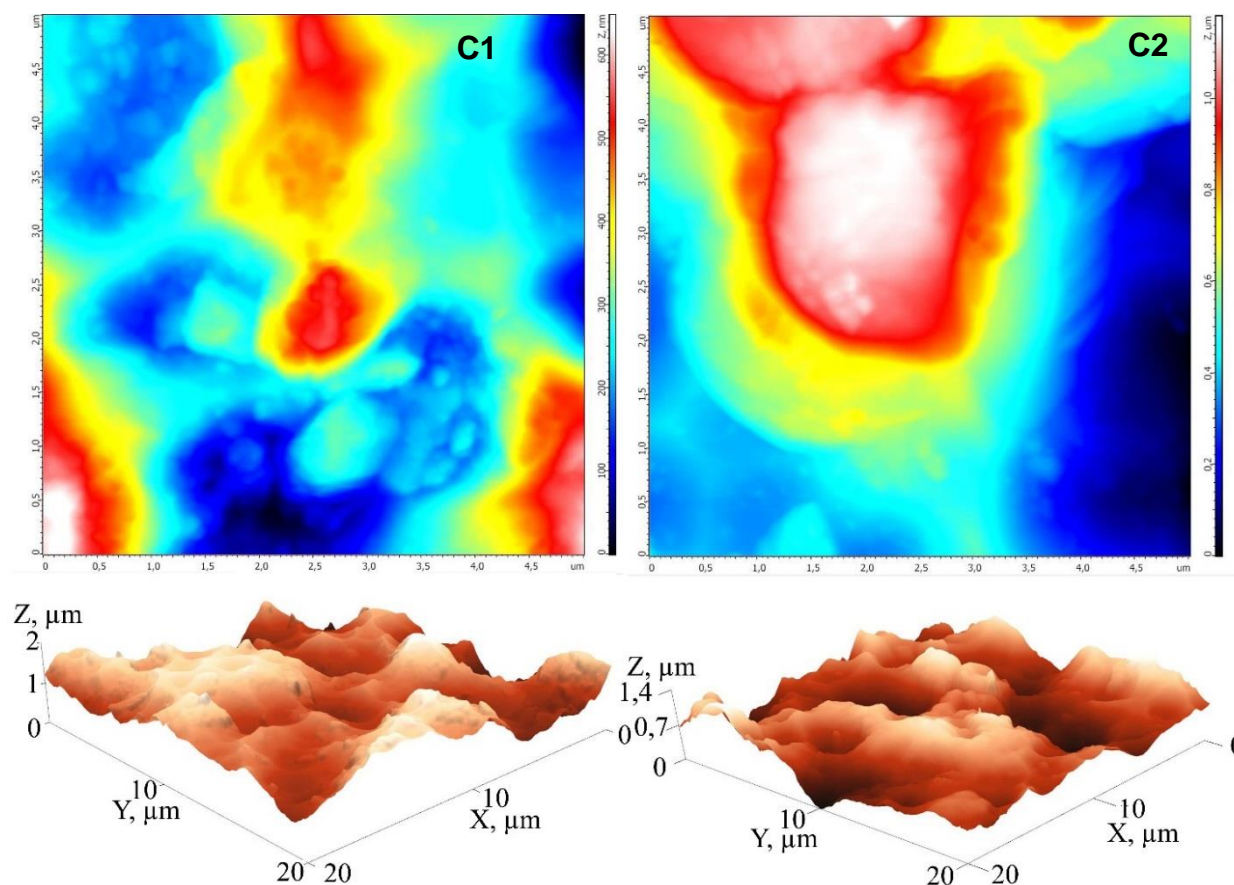

Figure S1. AFM images of control sample surfaces. C1 nitinol samples were machine polished, C2 samples were abraded by hand.

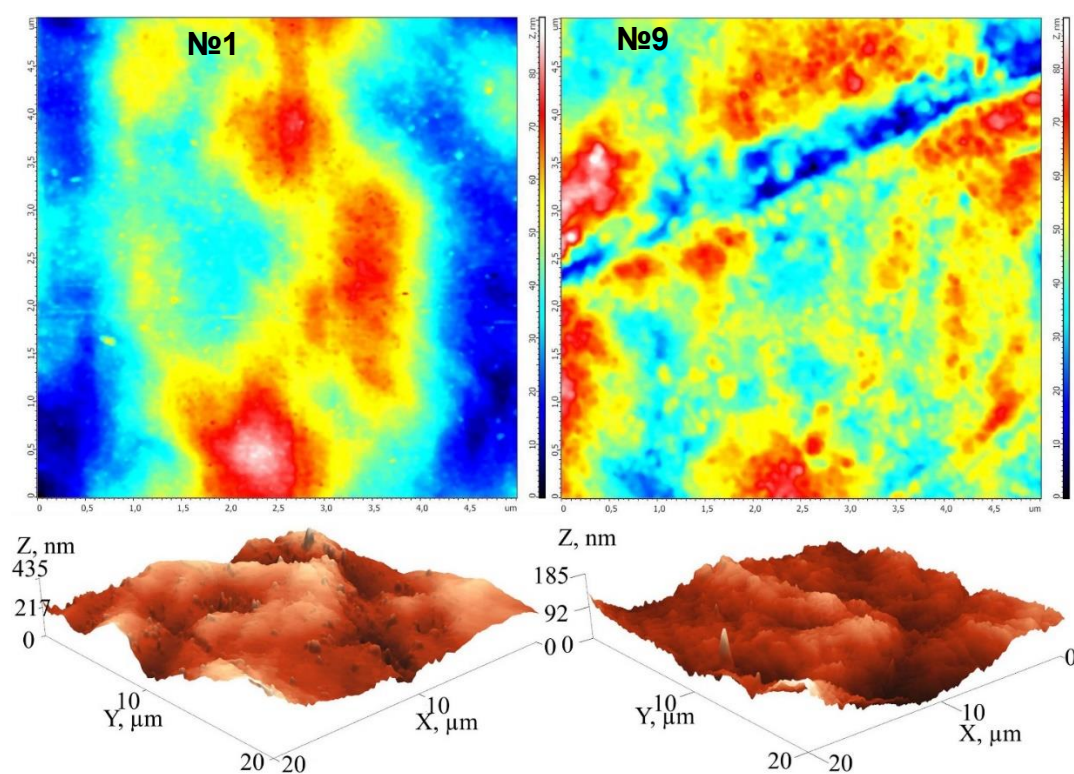

Figure S2. AFM images of samples coated with  $\text{TiO}_2$  thin films. Magnetron sputtering at  $U_{\text{bias}} = -100$  V. NiTi substrate were abraded by hand (№1) or machine polished (№9).

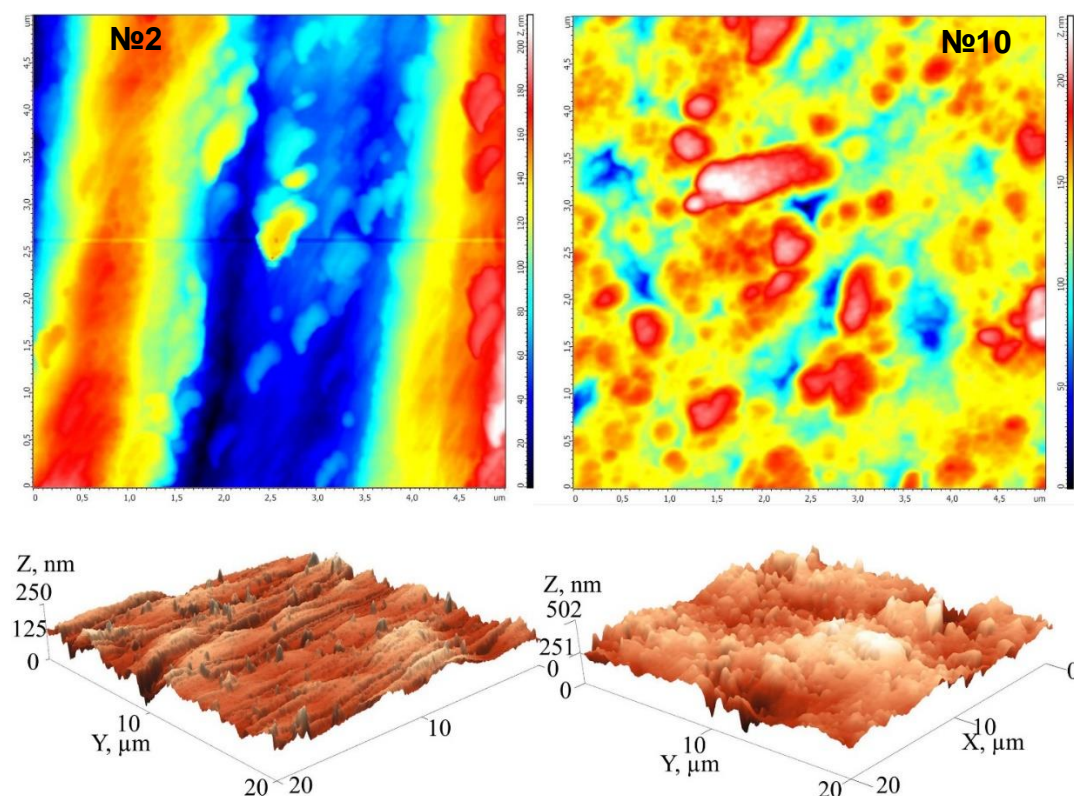

Figure S3. AFM images of samples coated with  $\text{TiO}_2$  thin films. Magnetron sputtering at  $U_{\text{bias}} = 0$  V. NiTi substrate were abraded by hand (№2) or machine polished (№10).



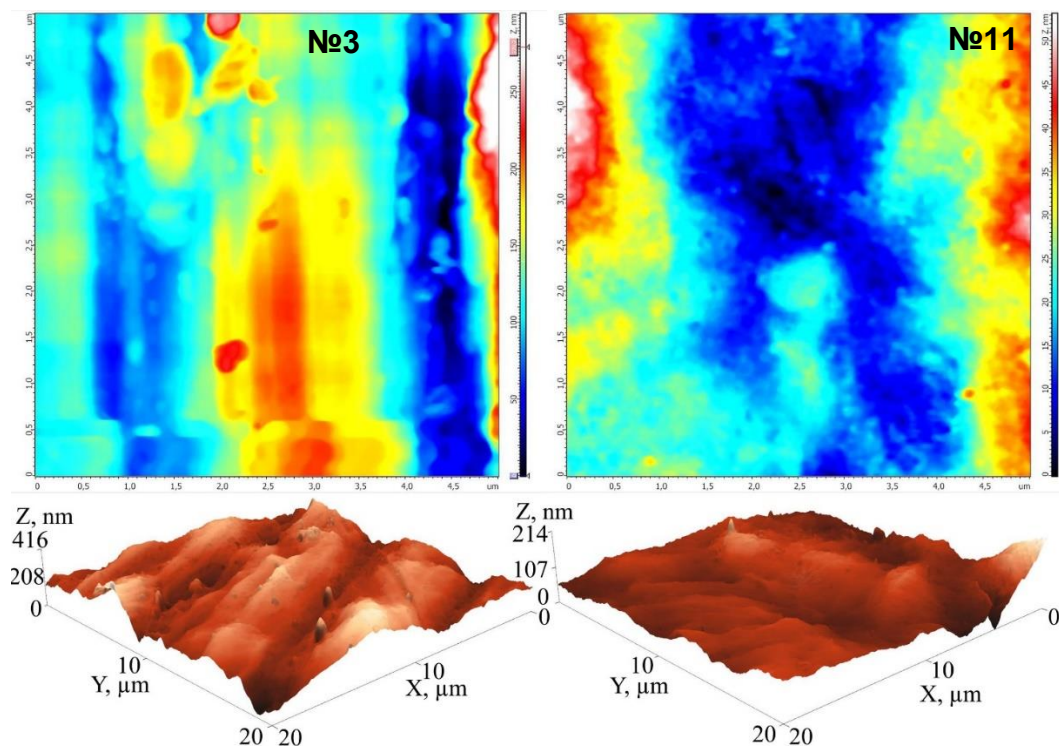

Figure S4. AFM images of samples coated with  $\text{TiO}_2$  thin films at gas ratio  $\text{O}_2:\text{N}_2=1:1$ . Magnetron sputtering at  $U_{\text{bias}} = -100$  V. NiTi substrate were abraded by hand (№3) or machine polished (№11).

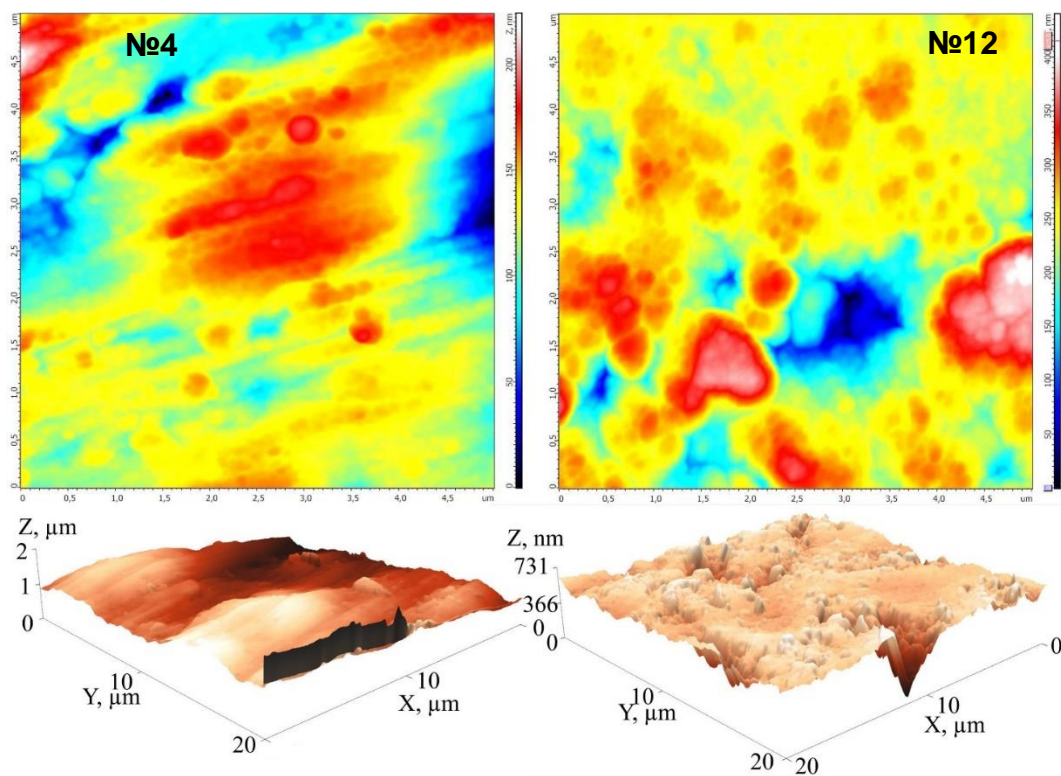

Figure S5. AFM images of samples coated with  $\text{TiO}_2$  thin films at gas ratio  $\text{O}_2:\text{N}_2=1:1$ . Magnetron sputtering at  $U_{\text{bias}} = 0$  V. NiTi substrate were abraded by hand (№4) or machine polished (№12).

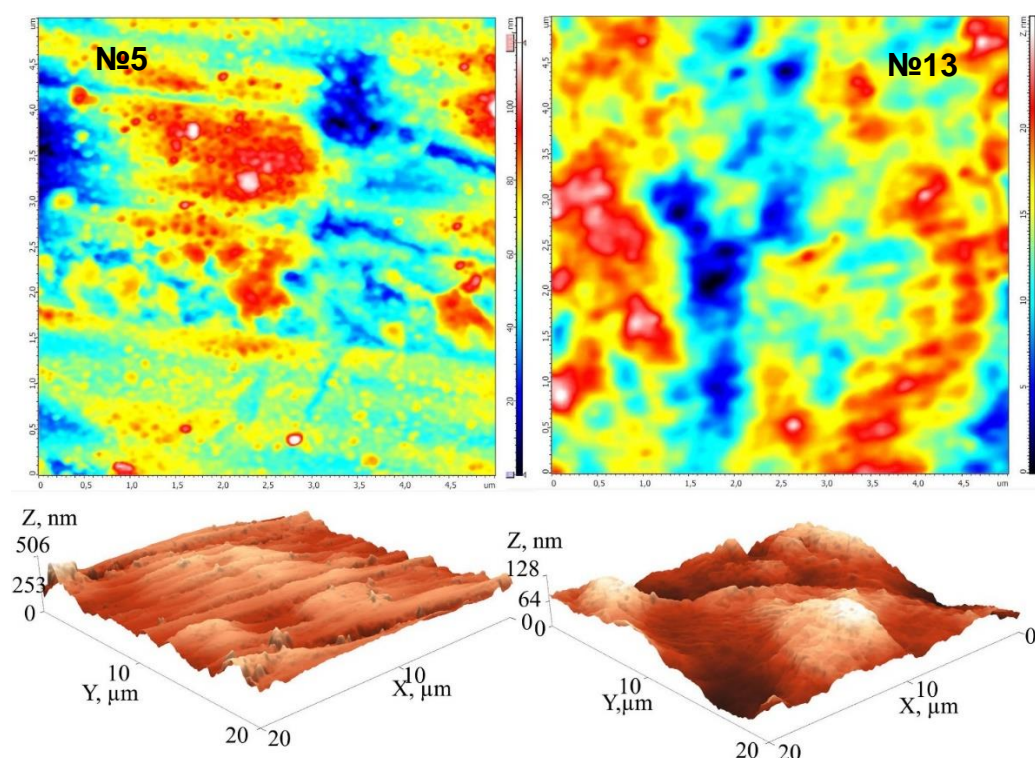

Figure S6. AFM images of samples coated with  $\text{TiO}_2$  films at gas ratio  $\text{O}_2:\text{N}_2=1:2$ . Magnetron sputtering at  $U_{\text{bias}} = -100$  V. NiTi substrate were abraded by hand (№5) or machine polished (№13).

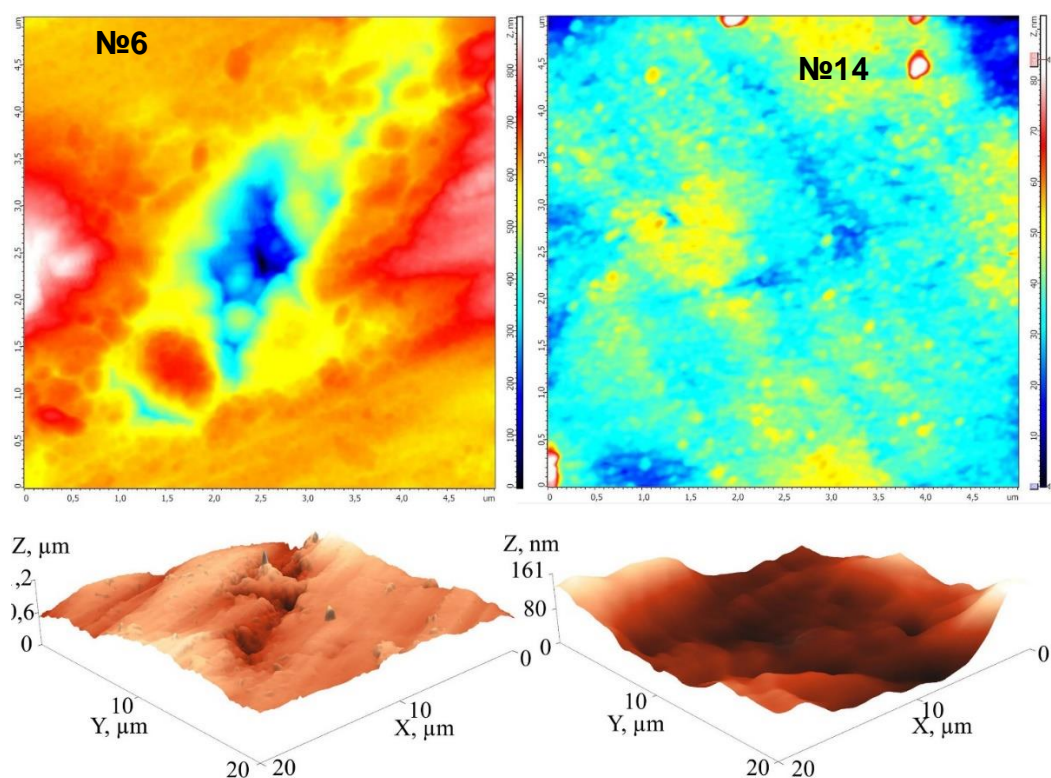

Figure S7. AFM images of samples coated with  $\text{TiO}_2$  films at gas ratio  $\text{O}_2:\text{N}_2=1:2$ . Magnetron sputtering at  $U_{\text{bias}} = 0$  V. NiTi substrate were abraded by hand (№6) or machine polished (№14).



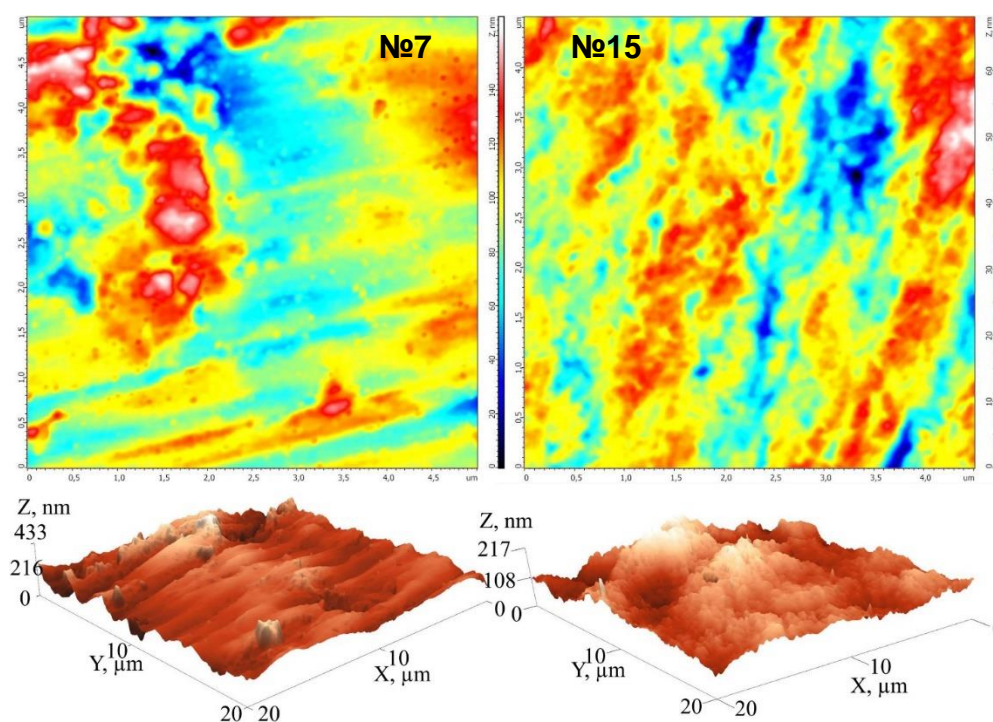

Figure S8. AFM images of samples coated with  $\text{TiO}_2$  films at gas ratio  $\text{O}_2:\text{N}_2=1:3$ . Magnetron sputtering at  $U_{\text{bias}} = -100$  V. NiTi substrate were abraded by hand (№7) or machine polished (№15).

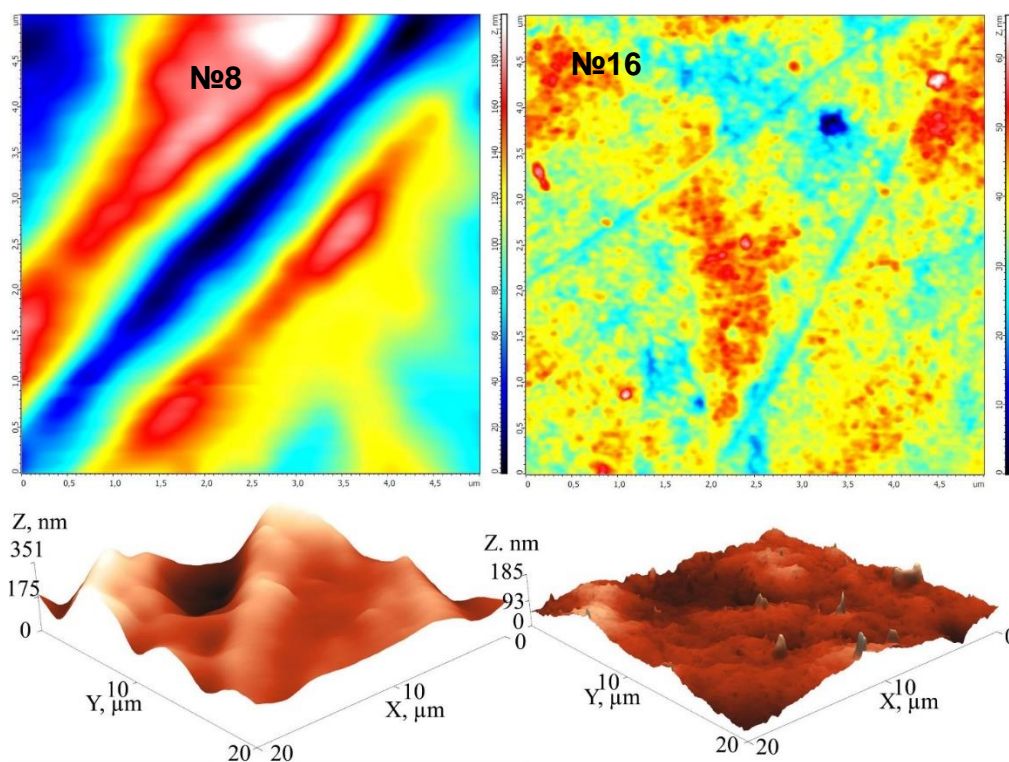

Figure S9. AFM images of samples coated with  $\text{TiO}_2$  films at gas ratio  $\text{O}_2:\text{N}_2=1:3$ . Magnetron sputtering at  $U_{\text{bias}} = 0$  V. NiTi substrate were abraded by hand (№8) or machine polished (№16).

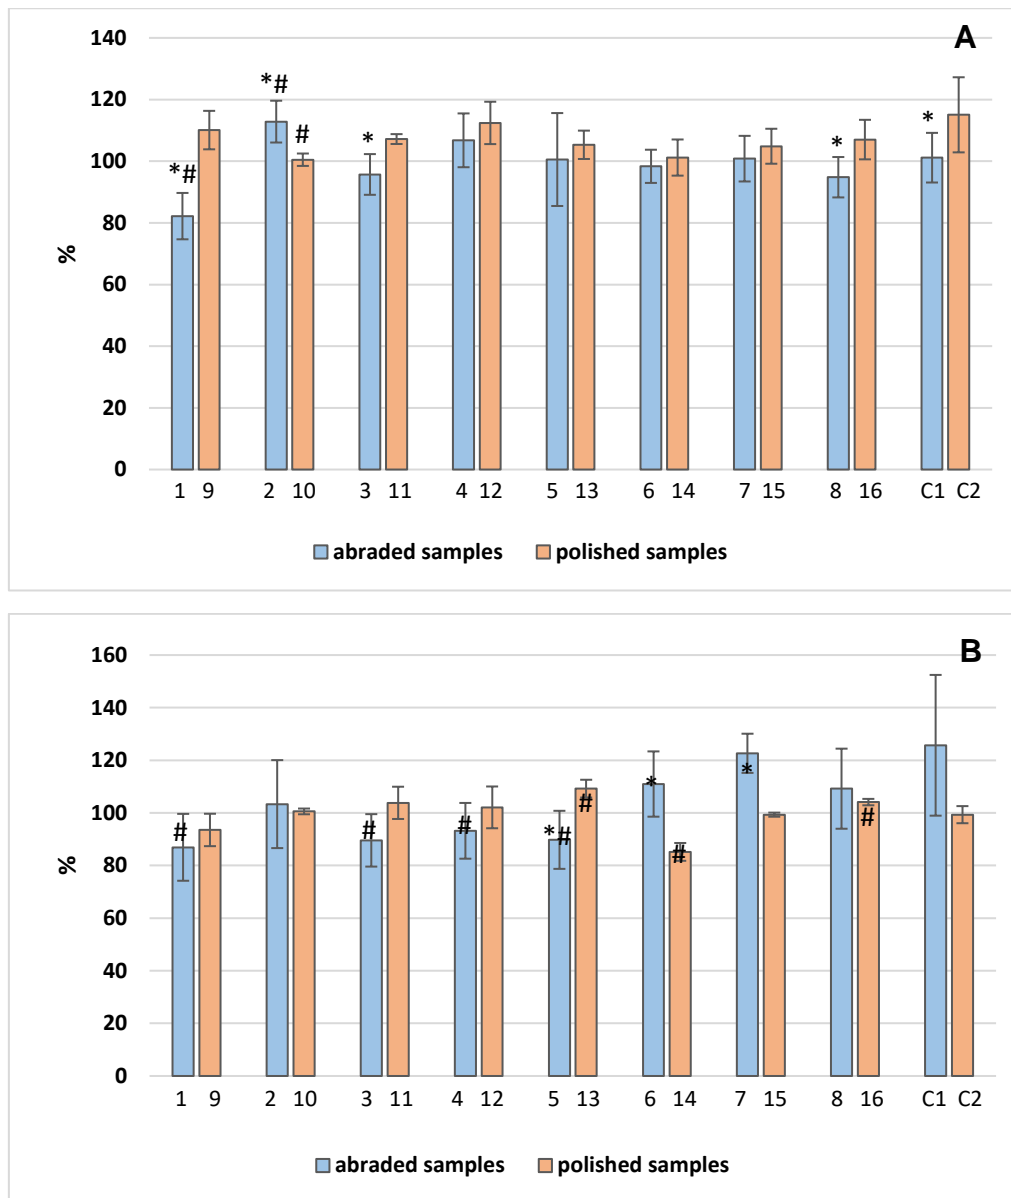

Figure S10. The viabilities of endothelial cells exposed to sample extracts during 24 h (A) and 72h (B); control group (100%) was cells cultivated in the DMEM/F12 medium without added extracts.

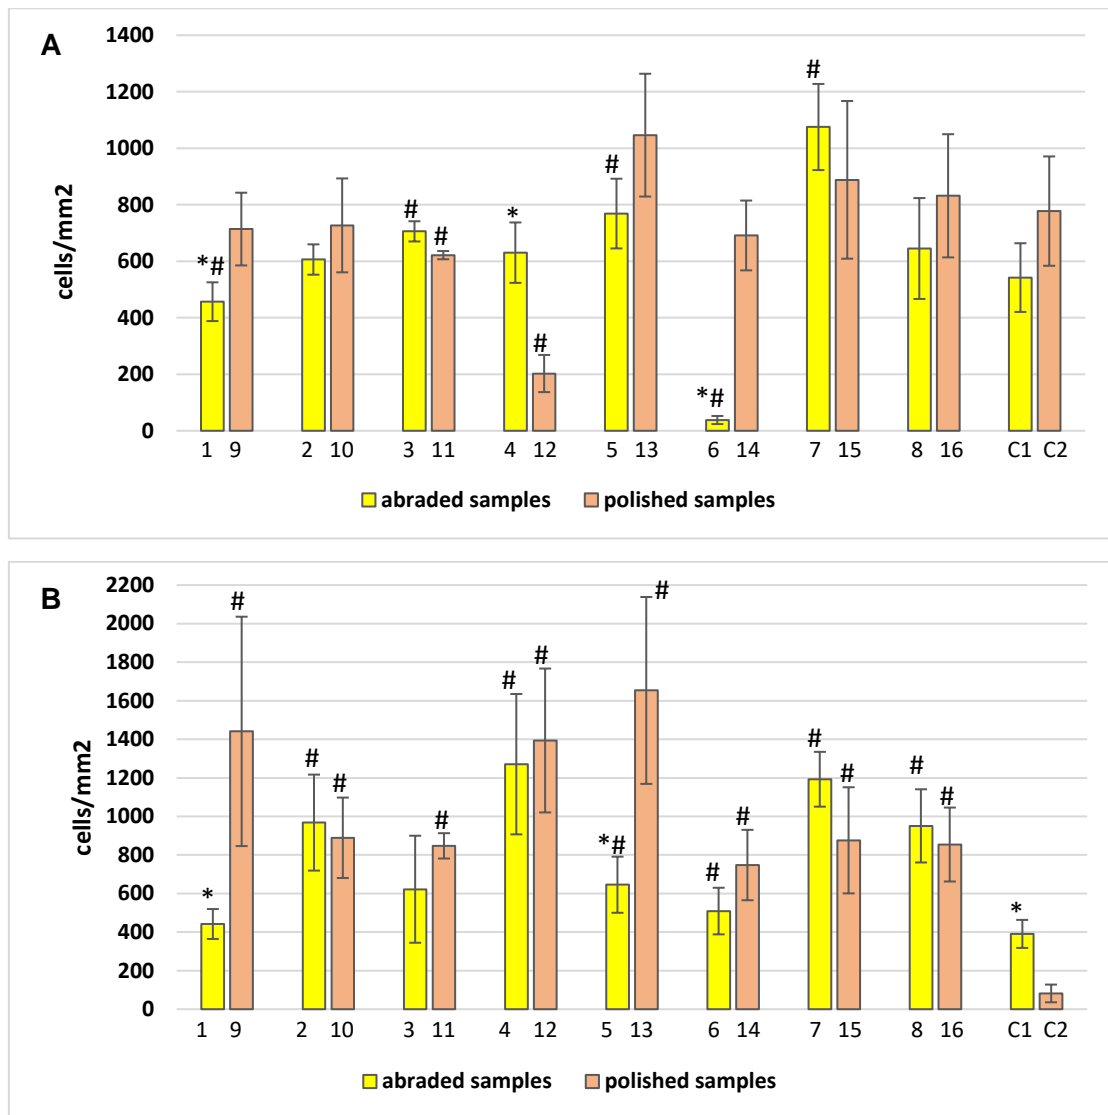

Figure S11. EA.hy926 cells' adhesion on the sample surfaces after 3 (A) and 6 (B) days.

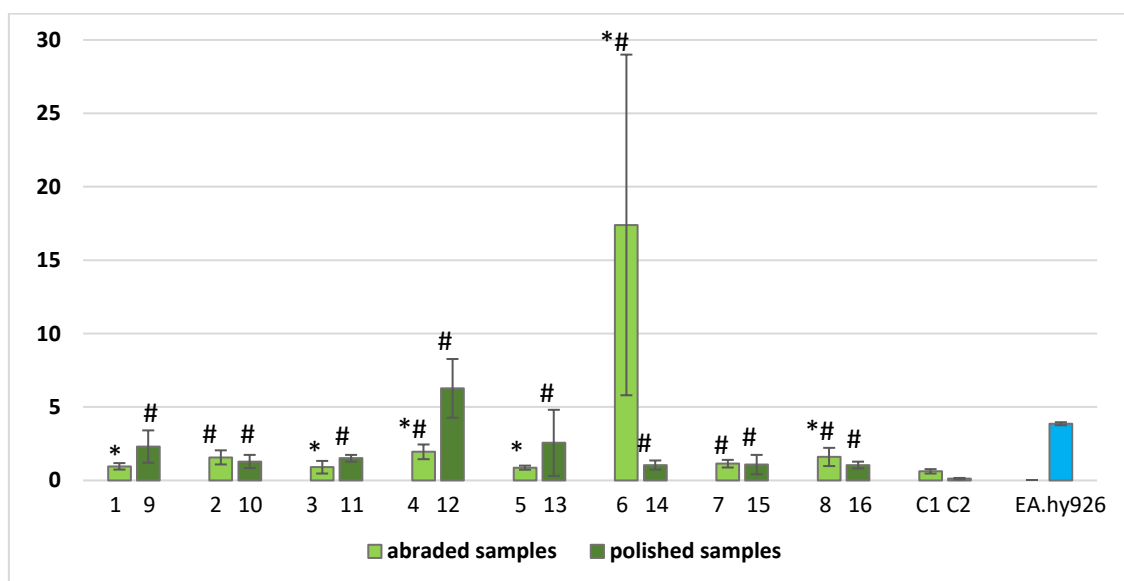

Figure S12. Proliferation index of EA.hy926 cells on abraded and polished surface of samples

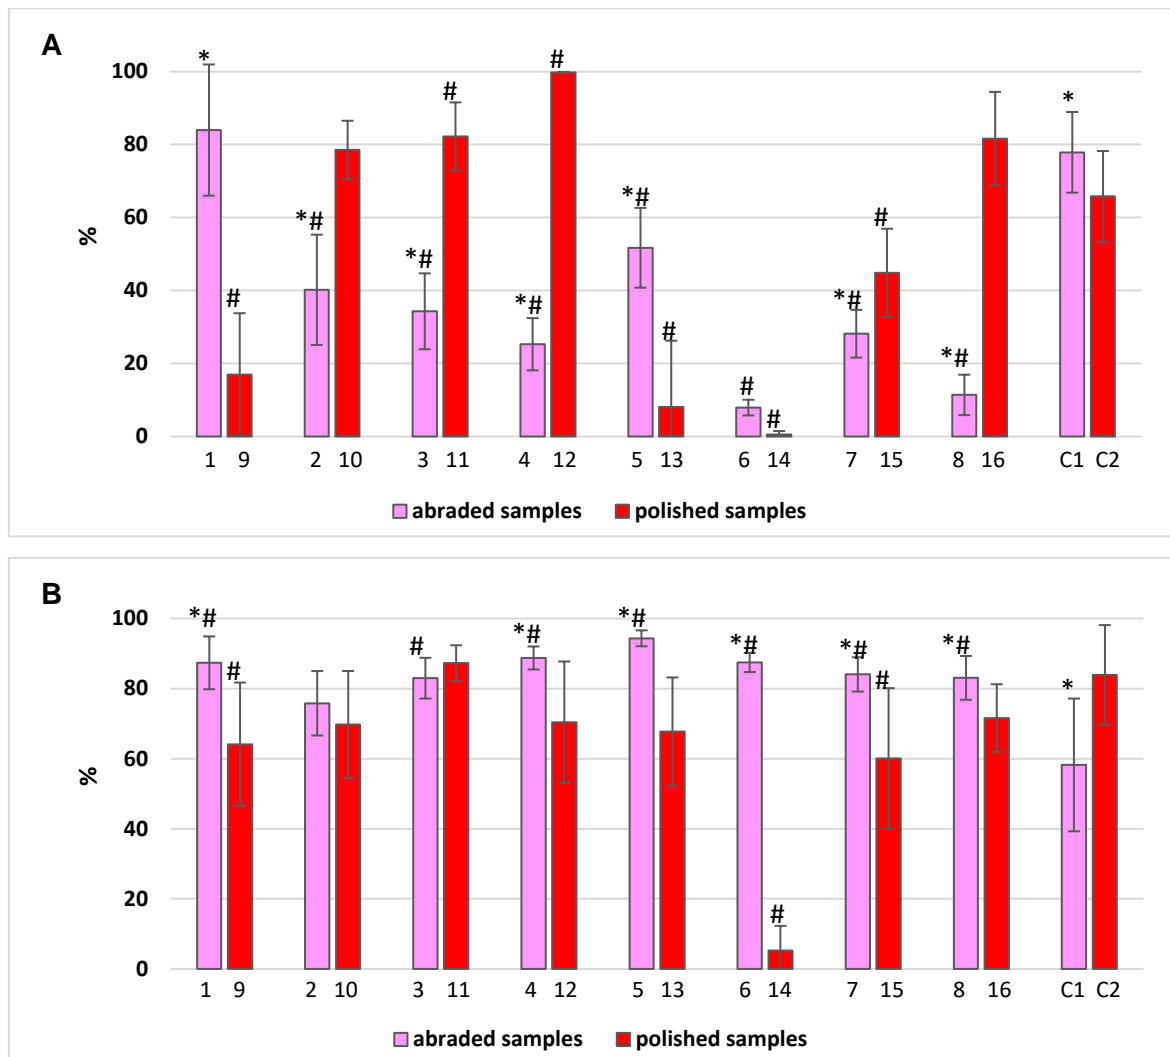

Figure S13. Viability of the EA.hy926 cells on abraded and polished surfaces samples after 3 (A) and 6 (B) days.

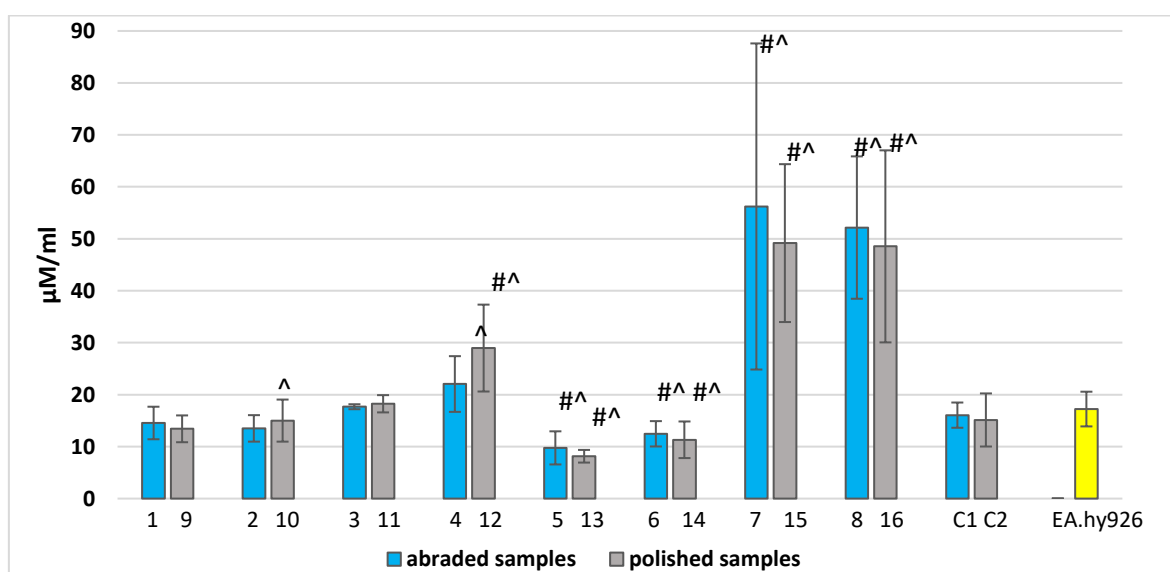

Figure S14. NO production of EA.hy926 cells on abraded and polished surfaces samples.



Table S1. Differences in Sq, Root mean square height of the surface

[illegible]

Table S2. Differences in maximum height of the surface (Sz)

[illegible]

Table S3. Differences in maximum peak height (Sp)

[illegible]

Table S4. Differences in kurtosis of height distribution (Sku)

[illegible]

Table S5. Differences in mean summit curvature (Ssc)

[illegible]

Table S6. Differences in density of summits of the surface (Sds)

[illegible]



Table S7. Statistical significance of differences in cell viabilities after 24-h incubation in sample extracts

|    | 1     | 2     | 3     | 4     | 5     | 6     | 7     | 8     | 9     | 10    | 11    | 12    | 13    | 14    | 15    |
|----|-------|-------|-------|-------|-------|-------|-------|-------|-------|-------|-------|-------|-------|-------|-------|
| 2  | 0.000 |       |       |       |       |       |       |       |       |       |       |       |       |       |       |
| 3  | 0.013 | 0.002 |       |       |       |       |       |       |       |       |       |       |       |       |       |
| 4  | 0.001 | 0.248 | 0.047 |       |       |       |       |       |       |       |       |       |       |       |       |
| 5  | 0.035 | 0.127 | 0.526 | 0.442 |       |       |       |       |       |       |       |       |       |       |       |
| 6  | 0.003 | 0.004 | 0.504 | 0.096 | 0.765 |       |       |       |       |       |       |       |       |       |       |
| 7  | 0.003 | 0.023 | 0.274 | 0.272 | 0.970 | 0.557 |       |       |       |       |       |       |       |       |       |
| 8  | 0.018 | 0.002 | 0.834 | 0.034 | 0.453 | 0.373 | 0.203 |       |       |       |       |       |       |       |       |
| 9  | 0.005 | 0.575 | 0.013 | 0.378 | 0.230 | 0.013 | 0.066 | 0.005 |       |       |       |       |       |       |       |
| 10 | 0.005 | 0.013 | 0.230 | 0.378 | 0.810 | 0.810 | 0.936 | 0.128 | 0.005 |       |       |       |       |       |       |
| 11 | 0.005 | 0.230 | 0.013 | 0.575 | 0.378 | 0.005 | 0.128 | 0.005 | 1.000 | 0.005 |       |       |       |       |       |
| 12 | 0.005 | 0.936 | 0.013 | 0.230 | 0.128 | 0.013 | 0.066 | 0.005 | 0.378 | 0.005 | 0.378 |       |       |       |       |
| 13 | 0.005 | 0.128 | 0.031 | 0.936 | 0.575 | 0.066 | 0.230 | 0.031 | 0.378 | 0.031 | 0.810 | 0.128 |       |       |       |
| 14 | 0.013 | 0.031 | 0.230 | 0.378 | 0.936 | 0.378 | 0.810 | 0.230 | 0.031 | 0.810 | 0.031 | 0.031 | 0.378 |       |       |
| 15 | 0.013 | 0.128 | 0.031 | 0.936 | 0.575 | 0.066 | 0.378 | 0.031 | 0.378 | 0.378 | 0.810 | 0.128 | 0.810 | 0.378 |       |
| 16 | 0.005 | 0.128 | 0.031 | 0.936 | 0.575 | 0.066 | 0.128 | 0.031 | 0.230 | 0.031 | 0.378 | 0.128 | 0.810 | 0.230 | 0.810 |

Table S8. Statistical significance of differences in cell viabilities after 72-h incubation in sample extracts

|    | 1     | 2     | 3     | 4     | 5     | 6     | 7     | 8     | 9     | 10    | 11    | 12    | 13    | 14    | 15    |
|----|-------|-------|-------|-------|-------|-------|-------|-------|-------|-------|-------|-------|-------|-------|-------|
| 2  | 0.080 |       |       |       |       |       |       |       |       |       |       |       |       |       |       |
| 3  | 0.698 | 0.114 |       |       |       |       |       |       |       |       |       |       |       |       |       |
| 4  | 0.375 | 0.238 | 0.554 |       |       |       |       |       |       |       |       |       |       |       |       |
| 5  | 0.688 | 0.128 | 0.973 | 0.595 |       |       |       |       |       |       |       |       |       |       |       |
| 6  | 0.008 | 0.391 | 0.008 | 0.024 | 0.011 |       |       |       |       |       |       |       |       |       |       |
| 7  | 0.000 | 0.027 | 0.000 | 0.000 | 0.000 | 0.076 |       |       |       |       |       |       |       |       |       |
| 8  | 0.020 | 0.540 | 0.025 | 0.061 | 0.030 | 0.830 | 0.080 |       |       |       |       |       |       |       |       |
| 9  | 0.471 | 0.378 | 0.575 | 0.810 | 0.936 | 0.013 | 0.005 | 0.093 |       |       |       |       |       |       |       |
| 10 | 0.066 | 0.378 | 0.031 | 0.230 | 0.066 | 0.066 | 0.005 | 0.378 | 0.378 |       |       |       |       |       |       |
| 11 | 0.020 | 0.378 | 0.066 | 0.173 | 0.020 | 0.378 | 0.005 | 0.378 | 0.378 | 1.000 |       |       |       |       |       |
| 12 | 0.031 | 0.936 | 0.066 | 0.378 | 0.066 | 0.378 | 0.013 | 0.575 | 0.378 | 0.810 | 1.000 |       |       |       |       |
| 13 | 0.005 | 0.936 | 0.005 | 0.005 | 0.005 | 0.810 | 0.013 | 0.810 | 0.378 | 0.005 | 0.378 | 0.128 |       |       |       |
| 14 | 0.575 | 0.230 | 0.575 | 0.378 | 0.378 | 0.005 | 0.005 | 0.013 | 0.031 | 0.005 | 0.005 | 0.005 | 0.005 |       |       |
| 15 | 0.066 | 0.378 | 0.128 | 0.575 | 0.066 | 0.066 | 0.005 | 0.230 | 0.378 | 0.066 | 0.378 | 0.810 | 0.005 | 0.005 |       |
| 16 | 0.066 | 0.378 | 0.005 | 0.013 | 0.013 | 0.230 | 0.005 | 0.378 | 0.378 | 0.005 | 1.000 | 0.378 | 0.005 | 0.005 | 0.005 |

Table S9. Statistical significance of differences in cell viabilities between 24-h and 72-h incubation in sample extracts

| 1     | 2     | 3     | 4     | 5     | 6     | 7     | 8     | C1    | 9     | 10    | 11    | 12    | 13    | 14    | 15    | 16    | C2    |
|-------|-------|-------|-------|-------|-------|-------|-------|-------|-------|-------|-------|-------|-------|-------|-------|-------|-------|
| 0.345 | 0.463 | 0.225 | 0.225 | 0.173 | 0.116 | 0.028 | 0.116 | 0.043 | 0.917 | 0.463 | 0.345 | 0.028 | 0.463 | 0.028 | 0.116 | 0.917 | 0.116 |

Table S10. Statistical significance of differences in cell adhesion after three-day cultivation on sample surfaces

|    | 1     | 2     | 3     | 4     | 5     | 6     | 7     | 8     | 9     | 10    | 11    | 12    | 13    | 14    | 15    |
|----|-------|-------|-------|-------|-------|-------|-------|-------|-------|-------|-------|-------|-------|-------|-------|
| 2  | 0.037 |       |       |       |       |       |       |       |       |       |       |       |       |       |       |
| 3  | 0.037 | 0.037 |       |       |       |       |       |       |       |       |       |       |       |       |       |
| 4  | 0.053 | 0.624 | 0.713 |       |       |       |       |       |       |       |       |       |       |       |       |
| 5  | 0.020 | 0.066 | 0.713 | 0.241 |       |       |       |       |       |       |       |       |       |       |       |
| 6  | 0.020 | 0.020 | 0.020 | 0.014 | 0.014 |       |       |       |       |       |       |       |       |       |       |
| 7  | 0.020 | 0.020 | 0.020 | 0.014 | 0.043 | 0.014 |       |       |       |       |       |       |       |       |       |
| 8  | 0.270 | 0.540 | 1.000 | 0.670 | 0.594 | 0.014 | 0.020 |       |       |       |       |       |       |       |       |
| 9  | 0.014 | 0.171 | 0.855 | 0.411 | 0.784 | 0.008 | 0.014 | 0.784 |       |       |       |       |       |       |       |
| 10 | 0.012 | 0.210 | 0.676 | 0.296 | 0.835 | 0.012 | 0.022 | 0.754 | 1.000 |       |       |       |       |       |       |
| 11 | 0.036 | 0.648 | 0.144 | 0.784 | 0.083 | 0.008 | 0.008 | 0.648 | 0.036 | 0.076 |       |       |       |       |       |
| 12 | 0.006 | 0.006 | 0.006 | 0.006 | 0.006 | 0.006 | 0.006 | 0.006 | 0.008 | 0.012 | 0.008 |       |       |       |       |
| 13 | 0.083 | 0.083 | 0.121 | 0.121 | 0.171 | 0.008 | 0.927 | 0.171 | 0.235 | 0.403 | 0.171 | 0.006 |       |       |       |
| 14 | 0.012 | 0.296 | 0.531 | 0.403 | 0.296 | 0.012 | 0.012 | 0.835 | 0.784 | 0.676 | 0.235 | 0.006 | 0.121 |       |       |
| 15 | 0.008 | 0.055 | 0.523 | 0.083 | 0.523 | 0.008 | 0.523 | 0.315 | 0.315 | 0.403 | 0.055 | 0.006 | 0.784 | 0.296 |       |
| 16 | 0.012 | 0.047 | 0.531 | 0.095 | 0.676 | 0.012 | 0.060 | 0.210 | 0.523 | 0.403 | 0.121 | 0.006 | 0.411 | 0.403 | 0.784 |



Table S11. Statistical significance of differences in cell adhesion after six-day cultivation on sample surfaces.

|    | 1     | 2     | 3     | 4     | 5     | 6     | 7     | 8     | 9     | 10    | 11    | 12    | 13    | 14    | 15    |
|----|-------|-------|-------|-------|-------|-------|-------|-------|-------|-------|-------|-------|-------|-------|-------|
| 2  | 0.004 |       |       |       |       |       |       |       |       |       |       |       |       |       |       |
| 3  | 0.262 | 0.078 |       |       |       |       |       |       |       |       |       |       |       |       |       |
| 4  | 0.004 | 0.262 | 0.016 |       |       |       |       |       |       |       |       |       |       |       |       |
| 5  | 0.025 | 0.030 | 0.873 | 0.010 |       |       |       |       |       |       |       |       |       |       |       |
| 6  | 0.128 | 0.004 | 0.262 | 0.004 | 0.037 |       |       |       |       |       |       |       |       |       |       |
| 7  | 0.004 | 0.150 | 0.004 | 0.337 | 0.004 | 0.004 |       |       |       |       |       |       |       |       |       |
| 8  | 0.004 | 1.000 | 0.016 | 0.150 | 0.010 | 0.004 | 0.025 |       |       |       |       |       |       |       |       |
| 9  | 0.005 | 0.230 | 0.036 | 0.915 | 0.014 | 0.008 | 0.784 | 0.171 |       |       |       |       |       |       |       |
| 10 | 0.008 | 0.784 | 0.210 | 0.111 | 0.095 | 0.012 | 0.060 | 0.403 | 0.121 |       |       |       |       |       |       |
| 11 | 0.008 | 0.523 | 0.296 | 0.020 | 0.012 | 0.012 | 0.012 | 0.296 | 0.083 | 0.037 |       |       |       |       |       |
| 12 | 0.008 | 0.036 | 0.012 | 0.391 | 0.012 | 0.012 | 0.403 | 0.037 | 0.784 | 0.022 | 0.012 |       |       |       |       |
| 13 | 0.008 | 0.036 | 0.012 | 0.327 | 0.012 | 0.012 | 0.210 | 0.022 | 0.523 | 0.391 | 0.012 | 0.403 |       |       |       |
| 14 | 0.043 | 0.337 | 0.540 | 0.030 | 0.270 | 0.178 | 0.020 | 0.178 | 0.043 | 0.676 | 0.713 | 0.020 | 0.020 |       |       |
| 15 | 0.013 | 0.471 | 0.171 | 0.110 | 0.171 | 0.055 | 0.055 | 0.784 | 0.121 | 0.676 | 0.835 | 0.037 | 0.037 | 0.713 |       |
| 16 | 0.005 | 0.522 | 0.315 | 0.070 | 0.068 | 0.008 | 0.036 | 0.235 | 0.083 | 0.676 | 1.000 | 0.037 | 0.022 | 1.000 | 0.855 |

Table S12. Statistical significance of differences in cell adhesion between three and six-day cultivation on sample surfaces

| 1     | 2     | 3     | 4     | 5     | 6     | 7     | 8     | C1    | 9     | 10    | 11    | 12    | 13    | 14    | 15    | 16    | C2    |
|-------|-------|-------|-------|-------|-------|-------|-------|-------|-------|-------|-------|-------|-------|-------|-------|-------|-------|
| 0.893 | 0.043 | 0.686 | 0.028 | 0.138 | 0.043 | 0.225 | 0.080 | 0.046 | 0.028 | 0.345 | 0.043 | 0.043 | 0.225 | 0.686 | 0.917 | 0.686 | 0.018 |

Table S13. Statistical significance of differences in cell viability after three-day cultivation on sample surfaces

|    | 1     | 2     | 3     | 4     | 5     | 6     | 7     | 8     | 9     | 10    | 11    | 12    | 13    | 14    | 15    |
|----|-------|-------|-------|-------|-------|-------|-------|-------|-------|-------|-------|-------|-------|-------|-------|
| 2  | 0.022 |       |       |       |       |       |       |       |       |       |       |       |       |       |       |
| 3  | 0.012 | 0.403 |       |       |       |       |       |       |       |       |       |       |       |       |       |
| 4  | 0.012 | 0.095 | 0.144 |       |       |       |       |       |       |       |       |       |       |       |       |
| 5  | 0.037 | 0.210 | 0.060 | 0.014 |       |       |       |       |       |       |       |       |       |       |       |
| 6  | 0.012 | 0.012 | 0.012 | 0.014 | 0.014 |       |       |       |       |       |       |       |       |       |       |
| 7  | 0.012 | 0.144 | 0.210 | 0.594 | 0.014 | 0.014 |       |       |       |       |       |       |       |       |       |
| 8  | 0.012 | 0.022 | 0.012 | 0.070 | 0.014 | 0.014 | 0.020 |       |       |       |       |       |       |       |       |
| 9  | 0.008 | 0.083 | 0.121 | 0.173 | 0.013 | 0.066 | 0.171 | 0.784 |       |       |       |       |       |       |       |
| 10 | 0.144 | 0.012 | 0.012 | 0.008 | 0.008 | 0.008 | 0.012 | 0.012 | 0.008 |       |       |       |       |       |       |
| 11 | 0.315 | 0.008 | 0.008 | 0.005 | 0.005 | 0.005 | 0.008 | 0.008 | 0.005 | 0.648 |       |       |       |       |       |
| 12 | 0.008 | 0.008 | 0.008 | 0.005 | 0.005 | 0.005 | 0.008 | 0.008 | 0.005 | 0.008 | 0.005 |       |       |       |       |
| 13 | 0.008 | 0.036 | 0.055 | 0.066 | 0.020 | 0.378 | 0.083 | 0.083 | 0.378 | 0.008 | 0.005 | 0.006 |       |       |       |
| 14 | 0.012 | 0.012 | 0.012 | 0.008 | 0.008 | 0.315 | 0.012 | 0.012 | 0.171 | 0.012 | 0.008 | 0.006 | 0.927 |       |       |
| 15 | 0.036 | 0.648 | 0.235 | 0.013 | 0.378 | 0.005 | 0.036 | 0.008 | 0.022 | 0.012 | 0.008 | 0.006 | 0.022 | 0.012 |       |
| 16 | 0.676 | 0.012 | 0.012 | 0.008 | 0.022 | 0.008 | 0.012 | 0.012 | 0.008 | 0.676 | 0.927 | 0.006 | 0.008 | 0.012 | 0.008 |

Table S14. Statistical significance of differences in cell viability after six-day cultivation on sample surfaces

|    | 1     | 2     | 3     | 4     | 5     | 6     | 7     | 8     | 9     | 10    | 11    | 12    | 13    | 14    | 15    |
|----|-------|-------|-------|-------|-------|-------|-------|-------|-------|-------|-------|-------|-------|-------|-------|
| 2  | 0.055 |       |       |       |       |       |       |       |       |       |       |       |       |       |       |
| 3  | 0.262 | 0.150 |       |       |       |       |       |       |       |       |       |       |       |       |       |
| 4  | 0.749 | 0.006 | 0.025 |       |       |       |       |       |       |       |       |       |       |       |       |
| 5  | 0.109 | 0.004 | 0.004 | 0.006 |       |       |       |       |       |       |       |       |       |       |       |
| 6  | 1.000 | 0.010 | 0.055 | 0.423 | 0.004 |       |       |       |       |       |       |       |       |       |       |
| 7  | 0.423 | 0.109 | 0.873 | 0.055 | 0.004 | 0.200 |       |       |       |       |       |       |       |       |       |
| 8  | 0.337 | 0.262 | 0.873 | 0.078 | 0.006 | 0.200 | 0.749 |       |       |       |       |       |       |       |       |
| 9  | 0.031 | 0.378 | 0.121 | 0.022 | 0.008 | 0.036 | 0.083 | 0.055 |       |       |       |       |       |       |       |
| 10 | 0.036 | 0.523 | 0.060 | 0.012 | 0.012 | 0.012 | 0.060 | 0.060 | 0.927 |       |       |       |       |       |       |
| 11 | 0.784 | 0.036 | 0.403 | 0.676 | 0.060 | 1.000 | 0.531 | 0.296 | 0.036 | 0.022 |       |       |       |       |       |
| 12 | 0.083 | 0.648 | 0.210 | 0.022 | 0.012 | 0.022 | 0.144 | 0.531 | 0.648 | 0.676 | 0.037 |       |       |       |       |
| 13 | 0.055 | 0.235 | 0.144 | 0.144 | 0.022 | 0.144 | 0.144 | 0.144 | 0.784 | 0.531 | 0.095 | 0.835 |       |       |       |
| 14 | 0.014 | 0.014 | 0.020 | 0.020 | 0.020 | 0.020 | 0.020 | 0.020 | 0.014 | 0.020 | 0.020 | 0.020 | 0.020 |       |       |
| 15 | 0.008 | 0.173 | 0.022 | 0.008 | 0.008 | 0.008 | 0.014 | 0.036 | 0.411 | 0.144 | 0.012 | 0.210 | 0.927 | 0.014 |       |
| 16 | 0.020 | 0.471 | 0.055 | 0.008 | 0.008 | 0.008 | 0.036 | 0.121 | 0.471 | 0.927 | 0.014 | 1.000 | 0.523 | 0.014 | 0.471 |

Table S15. Statistical significance of differences in cell viability between three and six-day cultivation on sample surfaces

| 1     | 2     | 3     | 4     | 5     | 6     | 7     | 8     | C1    | 9     | 10    | 11    | 12    | 13    | 14    | 15    | 16    | C2    |
|-------|-------|-------|-------|-------|-------|-------|-------|-------|-------|-------|-------|-------|-------|-------|-------|-------|-------|
| 0.686 | 0.043 | 0.043 | 0.043 | 0.043 | 0.043 | 0.043 | 0.043 | 0.007 | 0.028 | 0.500 | 0.138 | 0.043 | 0.043 | 0.068 | 0.249 | 0.225 | 0.176 |
